# Supplementary material for: Differential chromatin accessibility and transcriptional dynamics define breast cancer subtypes and their lineages
Source: PubMed Central journal article supplement (PMC11584403; doi:10.1038/s43018-024-00773-6), 2024-10-30
Supplement: 43018_2024_773_MOESM1_ESM.pdf [file 43018_2024_773_MOESM1_ESM.pdf]

## Reporting Summary

Nature Portfolio wishes to improve the reproducibility of the work that we publish. This form provides structure for consistency and transparency in reporting. For further information on Nature Portfolio policies, see our [Editorial Policies](#) and the [Editorial Policy Checklist](#).

### Statistics

For all statistical analyses, confirm that the following items are present in the figure legend, table legend, main text, or Methods section.

n/a Confirmed

- The exact sample size ( $n$ ) for each experimental group/condition, given as a discrete number and unit of measurement
- A statement on whether measurements were taken from distinct samples or whether the same sample was measured repeatedly
- The statistical test(s) used AND whether they are one- or two-sided  
*Only common tests should be described solely by name; describe more complex techniques in the Methods section.*
- A description of all covariates tested
- A description of any assumptions or corrections, such as tests of normality and adjustment for multiple comparisons
- A full description of the statistical parameters including central tendency (e.g. means) or other basic estimates (e.g. regression coefficient) AND variation (e.g. standard deviation) or associated estimates of uncertainty (e.g. confidence intervals)
- For null hypothesis testing, the test statistic (e.g.  $F$ ,  $t$ ,  $r$ ) with confidence intervals, effect sizes, degrees of freedom and  $P$  value noted  
*Give  $P$  values as exact values whenever suitable.*
- For Bayesian analysis, information on the choice of priors and Markov chain Monte Carlo settings
- For hierarchical and complex designs, identification of the appropriate level for tests and full reporting of outcomes
- Estimates of effect sizes (e.g. Cohen's  $d$ , Pearson's  $r$ ), indicating how they were calculated

*Our web collection on [statistics for biologists](#) contains articles on many of the points above.*

### Software and code

Policy information about [availability of computer code](#)

Data collection

Data analysis

ggplot2\_3.3.2, R Development Core Team, <https://CRAN.R-project.org/package=ggplot2>  
 gridExtra\_2.3, R Development Core Team, <https://cran.r-project.org/package=gridExtra>  
 bulk-RNA-Seq expression, Li Ding Lab, [https://github.com/ding-lab/HTAN\\_bulkRNA\\_expression](https://github.com/ding-lab/HTAN_bulkRNA_expression)  
 inferCNV v0.8.2, (Tickle et al., 2019), <https://github.com/broadinstitute/infercnv>  
 Integrative Genomics Viewer, (Robinson et al., 2011), <https://igv.org>  
 Loupe Browser v.5.0, 10X genomics, <https://www.10xgenomics.com/products/loupe-browser>  
 magrittr\_1.5, R Development Core Team, <https://cran.r-project.org/package=magrittr>  
 Matrix\_1.2-17, R Development Core Team, <https://CRAN.R-project.org/package=Matrix>  
 MEDALT, (Wang et al., 2020), <https://github.com/KChen-lab/MEDALT>  
 MuTect v1.1.7, (Cibulskis et al., 2013), <https://github.com/broadinstitute/mutect>  
 pheatmap\_1.0.12, R Development Core Team, <https://cran.r-project.org/package=pheatmap>  
 Pindel v0.2.5, (Ye et al., 2009), <https://github.com/genome/pindel>  
 Python v3.7, Python Software Foundation, <https://www.python.org/>  
 R v3.6, R Development Core Team, <https://www.r-project.org/>  
 RColorBrewer\_1.1-2, R Development Core Team, <https://CRAN.R-project.org/package=RColorBrewer>  
 RCTD v.1.2.0, (Cable et al., 2021), <https://github.com/dmcable/RCTD>  
 reshape2\_1.4.3, R Development Core Team, <https://cran.r-project.org/package=reshape2>  
 Samtools v1.2, (Li et al., 2009), <https://www.htslib.org/>  
 scVarScan, Li Ding Lab, <https://github.com/ding-lab/10Xmapping>  
 SeqQEst, Li Ding Lab, <https://github.com/ding-lab/SeqQEst>  
 Seurat v3.1.2 and v4.0.3, (Butler et al., 2018), <https://cran.r-project.org/web/packages/Seurat>  
 somaticwrapper v1.5, Li Ding Lab, <https://github.com/ding-lab/somaticwrapper>  
 sva v3.40.0, (Huber et al., 2015), <https://bioconductor.org/packages/release/bioc/html/sva.html>  
 STAR v2.7.4a, (Dobin et al., 2013), <https://github.com/alexdobin/STAR>  
 Strelka v2.9.2, (Kim et al., 2018), <https://github.com/Illumina/strelka>  
 stringr\_1.4.0, R Development Core Team, <https://cran.r-project.org/package=stringr>  
 Subread v2.0.1, (Liao et al., 2013), <https://sourceforge.net/projects/subread/>  
 Tidyverse, (Wickham et al., 2019), <https://www.tidyverse.org/>  
 VarScan v2.3.8, (Koboldt et al., 2012), <https://dkoboldt.github.io/varscan/>  
 viridis\_0.5.1, R Development Core Team, <https://github.com/sjmgarnier/viridis>  
 viridisLite\_0.3.0, R Development Core Team, <https://github.com/sjmgarnier/viridis>  
 xCell v1.2, (Aran et al., 2017), <http://xCell.ucsf.edu/>  
 Monocle3 v3.10, <https://cole-trapnell-lab.github.io/monocle3/docs/installation/>  
 CopyKat 1.0.4 (Gao et al., 2021), <https://github.com/navinlabcode/copykat>  
 inferCNV post processing, [https://github.com/ding-lab/infer\\_cnv\\_postprocesssing.git](https://github.com/ding-lab/infer_cnv_postprocesssing.git)  
 AUCell v1.19.1, R-package  
 bulk-RNA-seq expression, [https://github.com/ding-lab/HTAN\\_bulkRNA\\_expression](https://github.com/ding-lab/HTAN_bulkRNA_expression)  
 Cell Ranger v6.0.2, 10X Genomics  
 Cell Ranger ATAC v2.0, 10X Genomics  
 Cell Ranger ARC v2.0, 10X Genomics  
 ChIPseeker v1.26.2, R-package  
 chromVAR v1.12.0, R-package  
 COCOON, <https://github.com/ding-lab/COCOONS>  
 ComplexHeatmap v2.6.2, R-package  
 GATK v4.0.0.0, <https://github.com/broadgsa/gatk>  
 gg dendro v0.1.22, R-package  
 igraph v1.2.6, R-package  
 InferCNV v0.99.7 and v1.11.2, <https://github.com/broadinstitute/infercnv>  
 MACS2 v2.2.7.1, <https://github.com/macs3-project/MACS>  
 MuTect v1.1.7 and MuTect2 v4.1.2.0, <https://github.com/broadinstitute/mutect>  
 motifmatchr v1.12.0, R-package  
 Pindel v0.2.5, <https://github.com/genome/pindel>  
 pySCENIC v0.11.2, <https://pyscenic.readthedocs.io/en/latest/index.html>  
 Scrublet v0.2.3, <https://github.com/swolock/scrublet>  
 scVarScan, <https://github.com/ding-lab/10Xmapping>  
 Seurat v4.0.5, R-package  
 Signac v1.3.0 and v.1.4.0, R-package  
 sklearn v0.24.2, python-package  
 slingshot, v2.5.1, R-package  
 Somaticwrapper v1.6, <https://github.com/ding-lab/somaticwrapper>  
 Space Ranger v1.3.0, 10X Genomics  
 survival v3.2.7, R-package  
 Strelka v2.9.2, <https://github.com/Illumina/strelka>  
 VarScan v2.3.8, <https://dkoboldt.github.io/varscan>  
 ctc v1.54.0, R-package  
 heatmap.plus v.1.3, R-package  
 deepcell v0.12.6, <https://github.com/vanvalenlab/deepcell-tf>

For manuscripts utilizing custom algorithms or software that are central to the research but not yet described in published literature, software must be made available to editors and reviewers. We strongly encourage code deposition in a community repository (e.g. GitHub). See the Nature Portfolio [guidelines for submitting code & software](#) for further information.

## Data

Policy information about [availability of data](#)

All manuscripts must include a [data availability statement](#). This statement should provide the following information, where applicable:

- Accession codes, unique identifiers, or web links for publicly available datasets
- A description of any restrictions on data availability
- For clinical datasets or third party data, please ensure that the statement adheres to our [policy](#)

All human sequencing and imaging data have been deposited via the Human Tumor Atlas Network (HTAN) dbGaP Study Accession: phs002371.v1.p1 ([https://www.ncbi.nlm.nih.gov/projects/gap/cgi-bin/study.cgi?study\\_id=phs002371.v1.p1](https://www.ncbi.nlm.nih.gov/projects/gap/cgi-bin/study.cgi?study_id=phs002371.v1.p1)). In addition, all data have been deposited to the HTAN Data Coordinating Center Data Portal at the National Cancer Institute: <https://data.humantumoratlas.org/> (under the HTAN WUSTL Atlas). The human genome reference (hg38) can be found at the 10x site (<https://www.10xgenomics.com/support/software/cell-ranger/downloads>).

## Human research participants

Policy information about [studies involving human research participants and Sex and Gender in Research](#).

|                             |                                                                                                                                                                                                                                                                                                                                                                                                                                                                                                                                                                                                                             |
|-----------------------------|-----------------------------------------------------------------------------------------------------------------------------------------------------------------------------------------------------------------------------------------------------------------------------------------------------------------------------------------------------------------------------------------------------------------------------------------------------------------------------------------------------------------------------------------------------------------------------------------------------------------------------|
| Reporting on sex and gender | <a href="#">Sex and gender were not considered in the study design.</a>                                                                                                                                                                                                                                                                                                                                                                                                                                                                                                                                                     |
| Population characteristics  | All patients involved in this study were between the ages of 30 and 89 with breast carcinoma. Patients were either treatment-naïve or had neoadjuvant therapy prior to sample collection. Detailed clinical information can be found in Supplementary Table 1.                                                                                                                                                                                                                                                                                                                                                              |
| Recruitment                 | Participants for this study were recruited from all patients undergoing surgical resection of breast cancer, and were screened only on the basis of resectable disease identified by the schedule contained within the electronic health record system (EPIC). Clinical research staff conducted a manual review to ensure each participant was assigned a number and consented at the Washington University in St. Louis, Department of Surgery and Barnes Jewish Hospital or on the day of surgery. All patients provided informed consent approved by the Washington University in St. Louis Institutional Review Board. |
| Ethics oversight            | Tissue samples were collected with written consent from all patients under the protocol 11-08117 with approval from the Washington University in St. Louis Institutional Review Board. Consent included the use of all de-identified patient data for publication. Participants were not compensated.                                                                                                                                                                                                                                                                                                                       |

Note that full information on the approval of the study protocol must also be provided in the manuscript.

## Field-specific reporting

Please select the one below that is the best fit for your research. If you are not sure, read the appropriate sections before making your selection.

Life sciences       Behavioural & social sciences       Ecological, evolutionary & environmental sciences

For a reference copy of the document with all sections, see [nature.com/documents/nr-reporting-summary-flat.pdf](https://nature.com/documents/nr-reporting-summary-flat.pdf)

## Life sciences study design

All studies must disclose on these points even when the disclosure is negative.

|                 |                                                                                                                                                                                                                                                                                                                                                                                                                                                                                                                                          |
|-----------------|------------------------------------------------------------------------------------------------------------------------------------------------------------------------------------------------------------------------------------------------------------------------------------------------------------------------------------------------------------------------------------------------------------------------------------------------------------------------------------------------------------------------------------------|
| Sample size     | Tumor samples were collected as patients underwent surgery during the collection time period on a rolling basis. The sample size in the manuscript is comparable or greater than most studies published to date. Tumor samples were collected as patients underwent surgery during the collection time period on a rolling basis, and thus no sample size was calculated. As the goal was to build an atlas, rather than to obtain sufficient statistical power, we included as many samples as we could up until manuscript submission. |
| Data exclusions | No data were excluded from the analysis.                                                                                                                                                                                                                                                                                                                                                                                                                                                                                                 |
| Replication     | We validated results using orthogonal technologies such as immunofluorescence staining, Codex, and spatial transcriptomics. Generally samples were not replicated but multiple fields of view were analyzed for consistency. General data quality was evaluated for all data presented in this study. Many samples were evaluated using multiple technologies to confirm key findings.                                                                                                                                                   |
| Randomization   | Due to our patient accrual on a rolling basis, we did not 'allocate' patients into specific treatment groups, thus the imbalance in the number of patients from each subtype. Moreover, the study was designed around discovery and characterization, rather than clinical comparison of clinical subtypes or treatment arms. Consequently, there was no issue of controlling for covariates to reduce statistical noise for improving regression.                                                                                       |
| Blinding        | Blinding was not relevant in our study as samples were collected from patients as they came into the clinic. As every sample was included in the study and processed in the same standardized way, knowledge of clinical phenotypes would not affect the study.                                                                                                                                                                                                                                                                          |

# Reporting for specific materials, systems and methods

We require information from authors about some types of materials, experimental systems and methods used in many studies. Here, indicate whether each material, system or method listed is relevant to your study. If you are not sure if a list item applies to your research, read the appropriate section before selecting a response.

## Materials & experimental systems

| n/a                                 | Involved in the study                                  |
|-------------------------------------|--------------------------------------------------------|
| <input type="checkbox"/>            | <input checked="" type="checkbox"/> Antibodies         |
| <input checked="" type="checkbox"/> | <input type="checkbox"/> Eukaryotic cell lines         |
| <input checked="" type="checkbox"/> | <input type="checkbox"/> Palaeontology and archaeology |
| <input checked="" type="checkbox"/> | <input type="checkbox"/> Animals and other organisms   |
| <input checked="" type="checkbox"/> | <input type="checkbox"/> Clinical data                 |
| <input checked="" type="checkbox"/> | <input type="checkbox"/> Dual use research of concern  |

## Methods

| n/a                                 | Involved in the study                           |
|-------------------------------------|-------------------------------------------------|
| <input checked="" type="checkbox"/> | <input type="checkbox"/> ChIP-seq               |
| <input checked="" type="checkbox"/> | <input type="checkbox"/> Flow cytometry         |
| <input checked="" type="checkbox"/> | <input type="checkbox"/> MRI-based neuroimaging |

## Antibodies

### Antibodies used

| Marker             | Cell type(s)          | Manufacturer   | Catalog   | Dilution |
|--------------------|-----------------------|----------------|-----------|----------|
| GATA3              | Luminal mature        | Akoya          | 4250085   | 1:100    |
| ckit               | Luminal progenitor    | Abcam          | ab216450  | 1:50     |
| CK14               | Basal/myoepithelial   | Akoya          | 4450031   | 1:800    |
| CK17               | Tumor cells           | Abcam          | ab239986  | 1:50     |
| CK19               | Tumor cells           | Abcam          | ab195872  | 1:200    |
| ER                 | Hormone receptor      | Akoya          | 4250074   | 1:100    |
| PR                 | Hormone receptor      | Abcam          | ab239793  | 1:100    |
| GLUT1              | Tumor cells           | Abcam          | ab196357  | 1:100    |
| Histone H3 Phospho | Tumor cells           | Akoya          | 4550115   | 1:800    |
| CD31               | Endothelium           | Akoya          | 4450017   | 1:100    |
| CD36               | Adipocytes            | Cell signaling | 39914     | 1:50     |
| E-Cadherin         | Epithelium            | Akoya          | 4250021   | 1:400    |
| PanCytokeratin     | Epithelium            | Akoya          | 4450020   | 1:200    |
| Podoplanin         | Lymphatic endothelium | Akoya          | 4250004   | 1:400    |
| SMA                | Fibroblasts           | eBiosciences   | MA1-06110 | 1:100    |
| Vimentin           | mesenchymal marker    | Akoya          | 4450050   | 1:100    |
| Ki67               | Proliferating cells   | Akoya          | 4250019   | 1:800    |
| CD3e               | T cells               | Akoya          | 4550119   | 1:100    |
| CD4                | CD4+T                 | Akoya          | 4550112   | 1:100    |
| CD8                | CD8+T                 | Akoya          | 4250012   | 1:800    |
| CD68               | Macrophage            | Akoya          | 4550113   | 1:200    |
| CD20               | B cells               | Abcam          | ab236434  | 1:100    |
| HLA-DR             | APCs                  | Akoya          | 4550118   | 1:100    |
| ERBB2              | Tumor cells           | Abcam          | ab194979  | 1:150    |
| MELK               | Tumor cells           | ThermoFisher   | MA517120  | 1:200    |
| Maspin             | Basal progenitor cell | Invitrogen     | PA5-35104 | 1:100    |

### Validation

| Marker             | Cell type(s)          | Manufacturer   | Catalog   | Supporting references (PMID or URL)                                                                     |
|--------------------|-----------------------|----------------|-----------|---------------------------------------------------------------------------------------------------------|
| GATA3              | Luminal mature        | Akoya          | 4250085   | <a href="https://www.akoyabio.com/phenocycler/assays/">https://www.akoyabio.com/phenocycler/assays/</a> |
| ckit               | Luminal progenitor    | Abcam          | ab216450  | 32474164                                                                                                |
| CK14               | Basal/myoepithelial   | Akoya          | 4450031   | <a href="https://www.akoyabio.com/phenocycler/assays/">https://www.akoyabio.com/phenocycler/assays/</a> |
| CK17               | Tumor cells           | Abcam          | ab239986  | 33462395                                                                                                |
| CK19               | Tumor cells           | Abcam          | ab195872  | 33950524                                                                                                |
| ER                 | Hormone receptor      | Akoya          | 4250074   | <a href="https://www.akoyabio.com/phenocycler/assays/">https://www.akoyabio.com/phenocycler/assays/</a> |
| PR                 | Hormone receptor      | Abcam          | ab239793  | 33579355                                                                                                |
| GLUT1              | Tumor cells           | Abcam          | ab196357  | 32399910                                                                                                |
| Histone H3 Phospho | Tumor cells           | Akoya          | 4550115   | <a href="https://www.akoyabio.com/phenocycler/assays/">https://www.akoyabio.com/phenocycler/assays/</a> |
| CD31               | Endothelium           | Akoya          | 4450017   | <a href="https://www.akoyabio.com/phenocycler/assays/">https://www.akoyabio.com/phenocycler/assays/</a> |
| CD36               | Adipocytes            | Cell signaling | 39914     | 35854007                                                                                                |
| E-Cadherin         | Epithelium            | Akoya          | 4250021   | <a href="https://www.akoyabio.com/phenocycler/assays/">https://www.akoyabio.com/phenocycler/assays/</a> |
| PanCytokeratin     | Epithelium            | Akoya          | 4450020   | <a href="https://www.akoyabio.com/phenocycler/assays/">https://www.akoyabio.com/phenocycler/assays/</a> |
| Podoplanin         | Lymphatic endothelium | Akoya          | 4250004   | <a href="https://www.akoyabio.com/phenocycler/assays/">https://www.akoyabio.com/phenocycler/assays/</a> |
| SMA                | Fibroblasts           | eBiosciences   | MA1-06110 | 24797069                                                                                                |
| Vimentin           | mesenchymal marker    | Akoya          | 4450050   | <a href="https://www.akoyabio.com/phenocycler/assays/">https://www.akoyabio.com/phenocycler/assays/</a> |
| Ki67               | Proliferating cells   | Akoya          | 4250019   | <a href="https://www.akoyabio.com/phenocycler/assays/">https://www.akoyabio.com/phenocycler/assays/</a> |
| CD3e               | T cells               | Akoya          | 4550119   | <a href="https://www.akoyabio.com/phenocycler/assays/">https://www.akoyabio.com/phenocycler/assays/</a> |
| CD4                | CD4+T                 | Akoya          | 4550112   | <a href="https://www.akoyabio.com/phenocycler/assays/">https://www.akoyabio.com/phenocycler/assays/</a> |
| CD8                | CD8+T                 | Akoya          | 4250012   | <a href="https://www.akoyabio.com/phenocycler/assays/">https://www.akoyabio.com/phenocycler/assays/</a> |
| CD68               | Macrophage            | Akoya          | 4550113   | <a href="https://www.akoyabio.com/phenocycler/assays/">https://www.akoyabio.com/phenocycler/assays/</a> |
| CD20               | B cells               | Abcam          | ab236434  | 32488028                                                                                                |

|        |             |              |          |                                                                                                                                                                                                     |
|--------|-------------|--------------|----------|-----------------------------------------------------------------------------------------------------------------------------------------------------------------------------------------------------|
| HLA-DR | APCs        | Akoya        | 4550118  | <a href="https://www.akoyabio.com/phenocycler/assays/">https://www.akoyabio.com/phenocycler/assays/</a>                                                                                             |
| ERBB2  | Tumor cells | Abcam        | ab194979 | 34824220                                                                                                                                                                                            |
| MELK   | Tumor cells | Thermofisher | MA517120 | <a href="https://www.thermofisher.com/antibody/product/MELK-Antibody-clone-2G2-Monoclonal/MA5-17120">https://www.thermofisher.com/antibody/product/MELK-Antibody-clone-2G2-Monoclonal/MA5-17120</a> |
